# Supplementary material for: Functional classification of proteins based on projection of amino acid sequences: application for prediction of protein kinase substrates
Source: Springer Nature journal article supplement (doi:10.1186/1471-2105-11-313), 2010-06-10

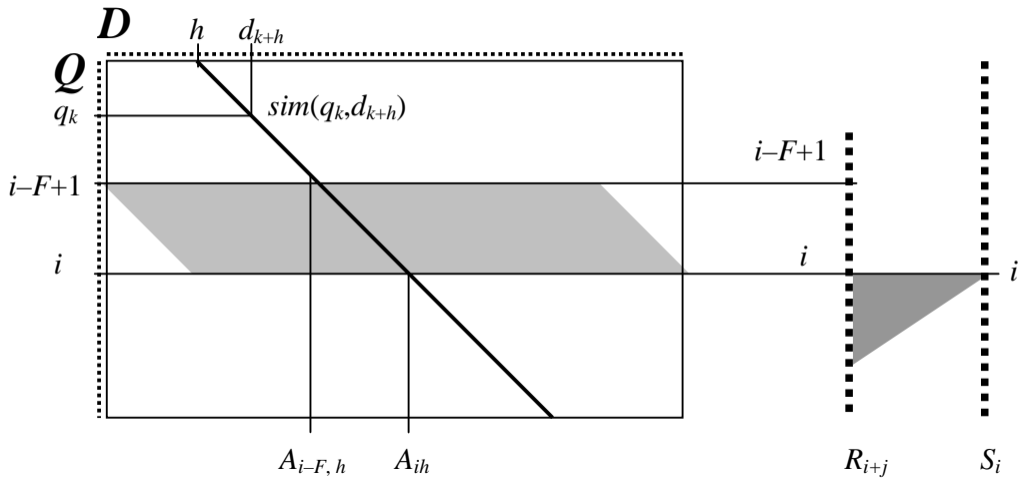

Supplement: 12859_2009_3770_MOESM2_ESM.pdf [file 12859_2009_3770_MOESM2_ESM.pdf]
